# Supplementary material for: Sox2- Evf2 lncRNA-mediated mechanisms of chromosome topological control in developing forebrain
Source: Oxford University Press journal article supplement (doi:10.1242/dev.197202), 2021-02-16
Supplement: dev197202supp.pdf [file dev197202supp.pdf]

**Table S1. 4Cseq-Dlx5/6UCE Bait counts on mouse chr6:**

*Evf2*<sup>+/+</sup>: *Evf2* (+) regulated

*Evf2*<sup>TS/TS</sup>: *Evf2* (-) regulated

Conserved: *Evf2* (I) independent

Sox2 regulated: *Sox2*<sup>fl/fl</sup> (cre negative, Sox2 (+) regulated), *Sox2*<sup>fl/fl</sup>:*Dlx5/6cre* (Sox2 (-) regulated)

[Click here to Download Table S1](#)

## Fig\_S1

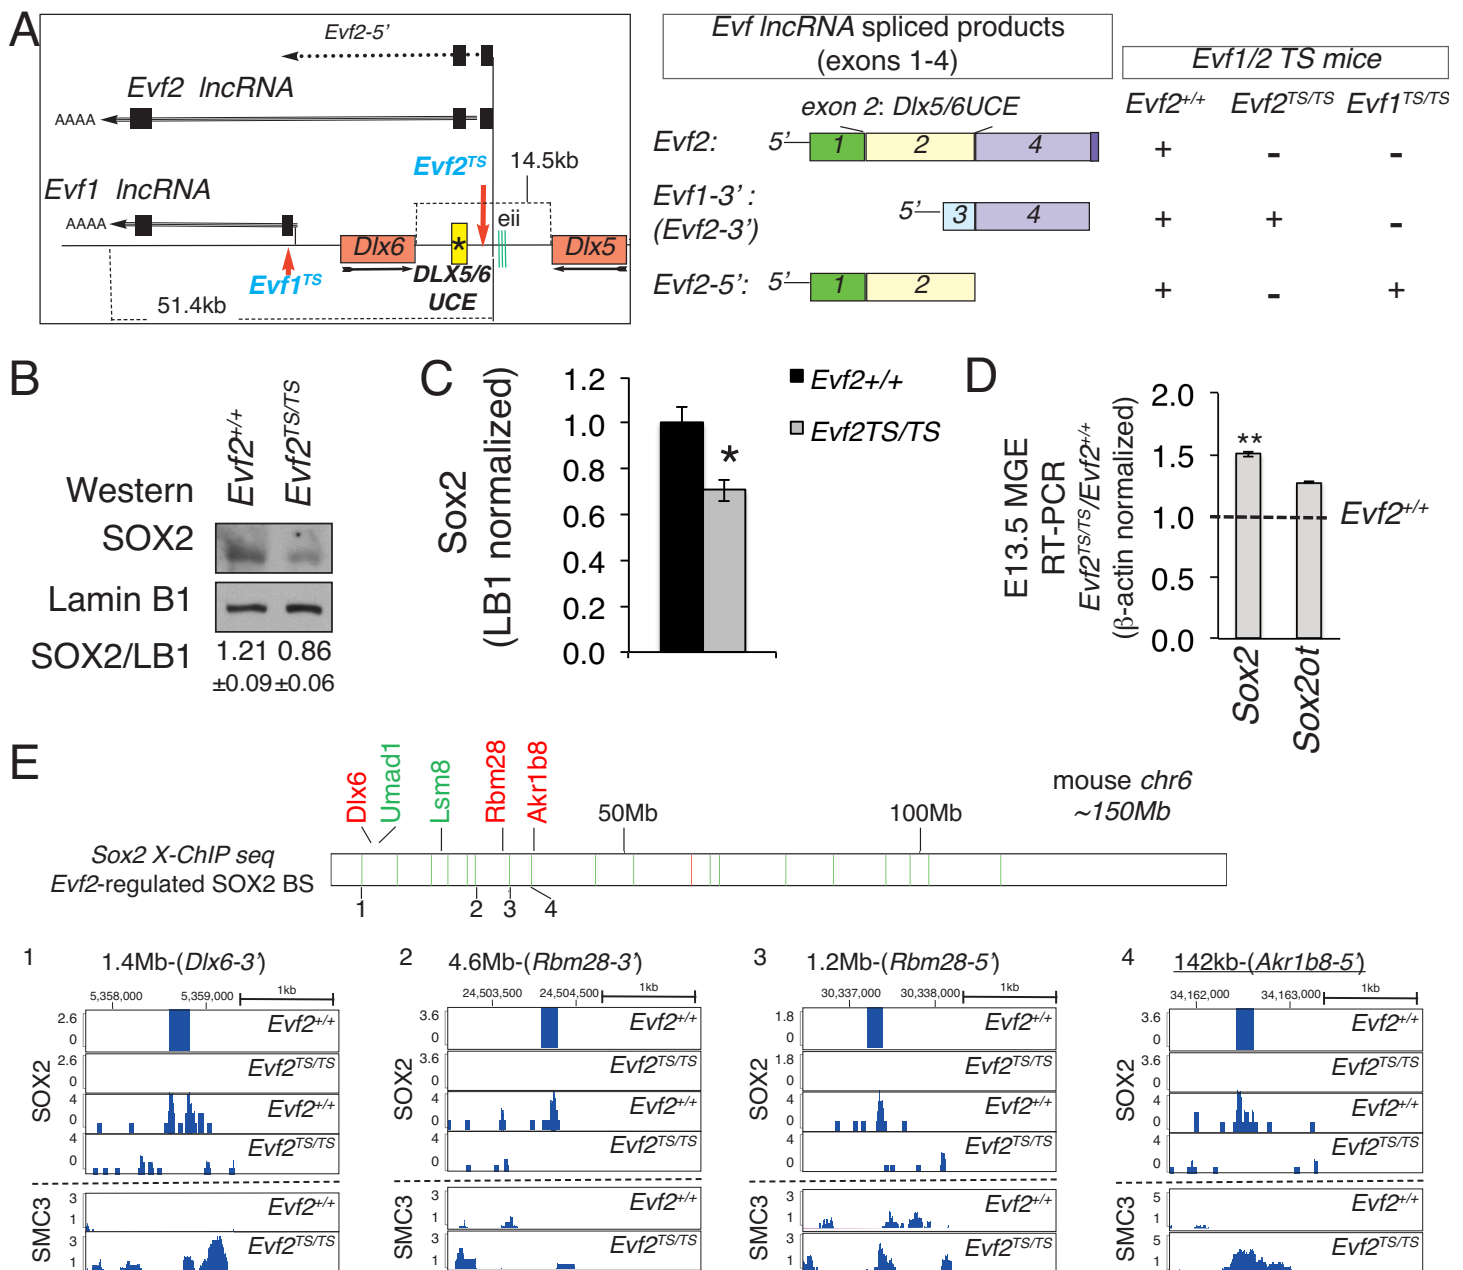

**Figure S1. Evf2 regulation of Evf2 Sox2 RNP.** **A.** (Left) On mouse chr6, the sites of *Evf1/2* transcription stop insertions (TS, blue) are shown with respect to repressed genes *Dlx5* and *Dlx6* (red boxes), and polyadenylated and spliced *Evf1*, *Evf2*, and *Evf2-5'* transcripts (exons 1-4 in black). *Dlx5/6UCE* sequences are in yellow with star. (Right) *Evf* contains 4 exons; depending on placement of the TS insertion, different combination of *Evf* spliced forms are produced. **B.C.** Western analysis of Sox2 protein levels in *Evf2* expressing (*Evf2*<sup>+/+</sup>) and *Evf2* lacking (*Evf2*<sup>TS/TS</sup>) E13.5GE extracts, (normalized to Lamin B1) shows ~25% decrease in Sox2 protein levels in the absence of *Evf2*. **D.** Taqman qRT-PCR of *Sox2* and *Sox2ot* (a ~118kb overlapping transcript) (RNA levels in *Evf2*<sup>+/+</sup> and *Evf2*<sup>TS/TS</sup> E13.5GE shows ~50% increase in *Sox2* RNA, but no change in *Sox2ot* RNA (normalized to β-actin). A-C. n=3/genotype, Student's *t* test. **E.** *Evf2* regulation of *Evf2* RNPs *Sox2* and *Smc3*. *Sox2* ChIPseq profiles across mouse chr6 from crosslinked chromatin isolated from *Evf2* expressing (*Evf2*<sup>+/+</sup>) and *Evf2* lacking (*Evf2*<sup>TS/TS</sup>) E13.5GE. *Evf2* positively regulated *Sox2* binding sites (BS) (green bars), and negatively regulated (red bars) are shown. *Evf2* repressed gene targets are labeled in red (*Dlx*, *Rbm28*, *Akr1b8*), activated gene targets in green (*Umad1*, *Lsm8*). Peaks from sites labelled 1-4 overlap with *Evf2* positively regulated *Sox2* binding (differential MACS2 (peak calling algorithm used for ChIPseq, Zhang et al. 2008) binding site shown in top two rows) and *Smc3* binding peaks. Site 1: *Sox2* (+) *Smc3* (-), Site 2: *Sox2* (+) *Smc3* (no peak), Site 3: *Sox2* (+) *Smc3* binding (but not *Evf2* regulated), Site 4: *Sox2* (+) *Smc3* (-), n=2/genotype, Sites 1-4 top two rows (differential MACS2), rows 3-6 (MACS2. FDR<0.05).

## Fig\_S2

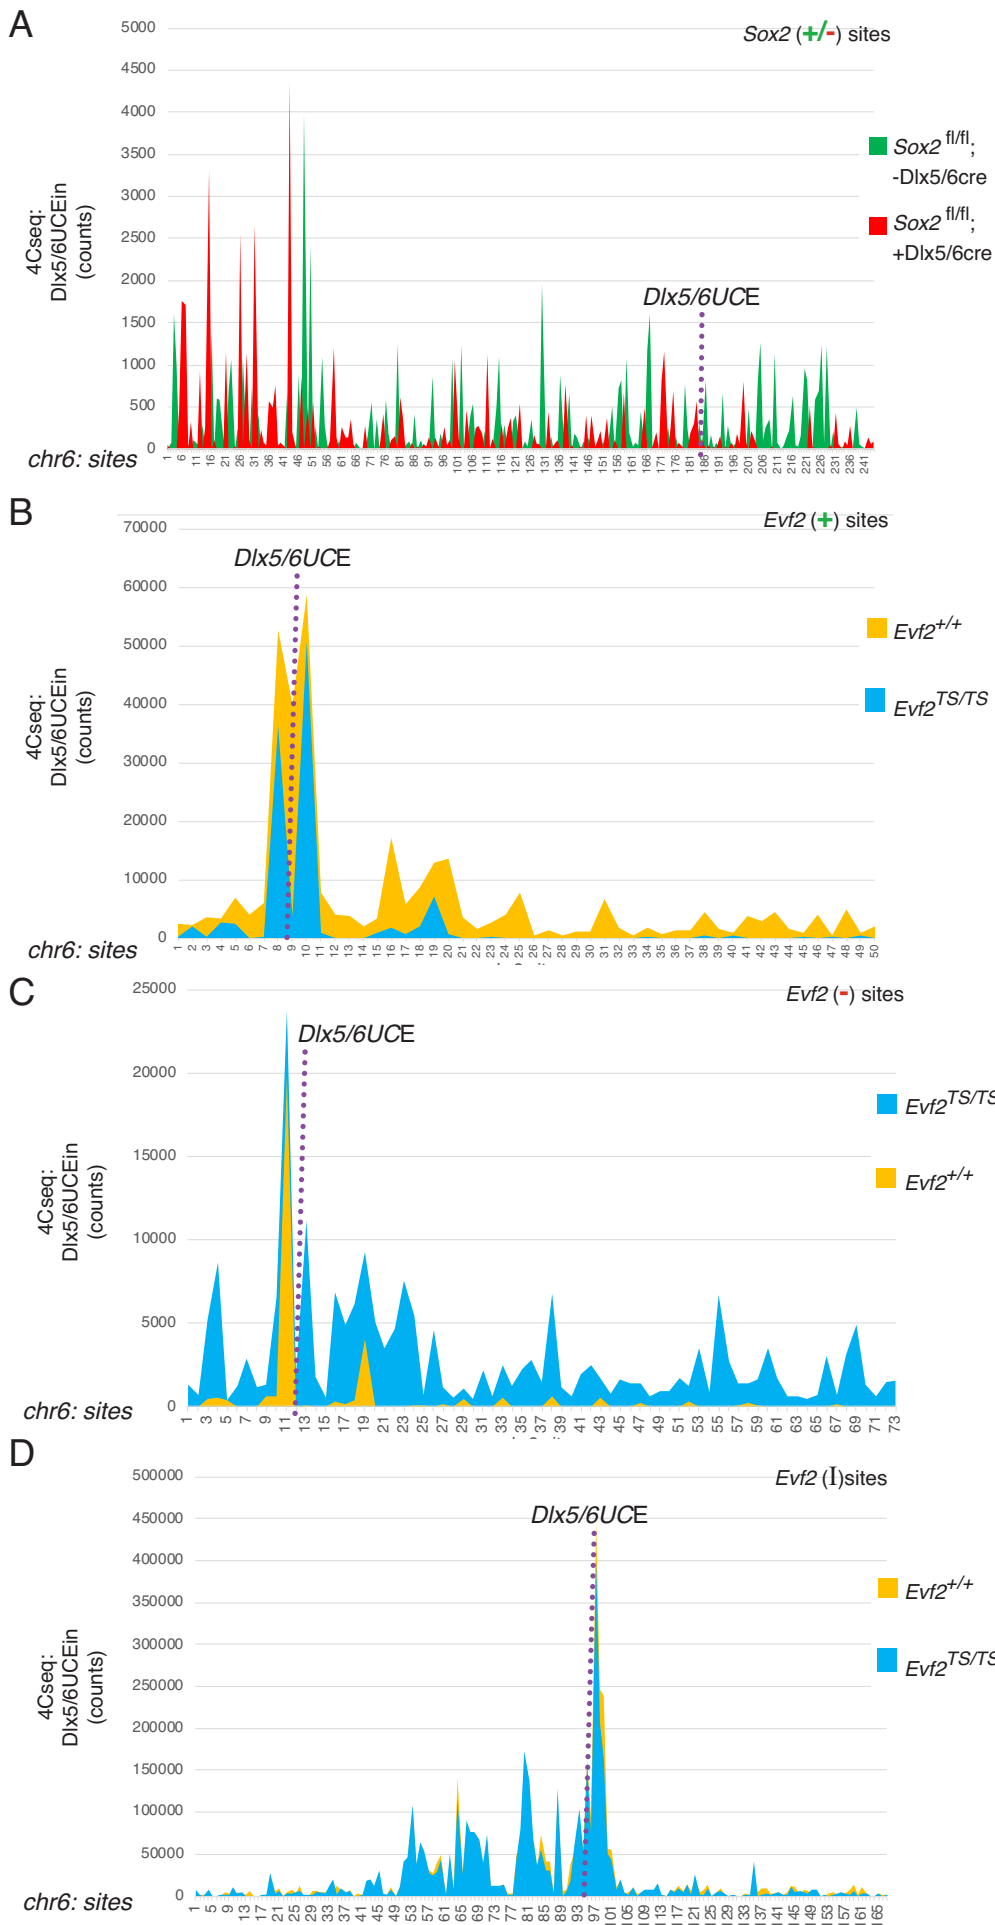

**Figure S2. 4Cseq counts identify Sox2 and Evf2 regulated Dlx5/6UCEins across mouse chr6 in E13.5GEs**

**A.** Sox2 (+) positively regulated Dlx5/6UCEins from Sox2<sup>fl/fl</sup>; -Dlx5/6cre (presence of Sox2), and Sox2 (-) negatively regulated Dlx5/6UCEins, Sox2<sup>fl/fl</sup>; +Dlx5/6cre (absence of Sox2). n=4/each genotype 4Cseq intersection of two computational methods (FourCseq and DEseq). Scaled counts for FDR <0.01 are plotted.

**B.** Evf2 (+) positively-regulated Dlx5/6UCEin sites (orange) Evf2<sup>+/+</sup> (presence of Evf2), and Evf2 (-) negatively regulated Dlx5/6UCEins (blue) Evf2<sup>TS/TS</sup> (absence of Evf2).

**C.** Evf2 (-) negatively regulated sites (blue) Evf2<sup>+/+</sup> (presence of Evf2), and Evf2<sup>TS/TS</sup> (absence of Evf2).

**D.** Dlx5/6UCEins independent of Evf2 (Evf2 (I) sites). In B-D data is summarized from Cajigas et al 2018.

note:

-Y-axis: count numbers from 4Cseq using Dlx5/6UCE as bait  
-X-axis: numbers correspond to chr6 location sites listed for each genotype (Excel).

-Dlx5/6UCE bait location indicated by purple dotted lines

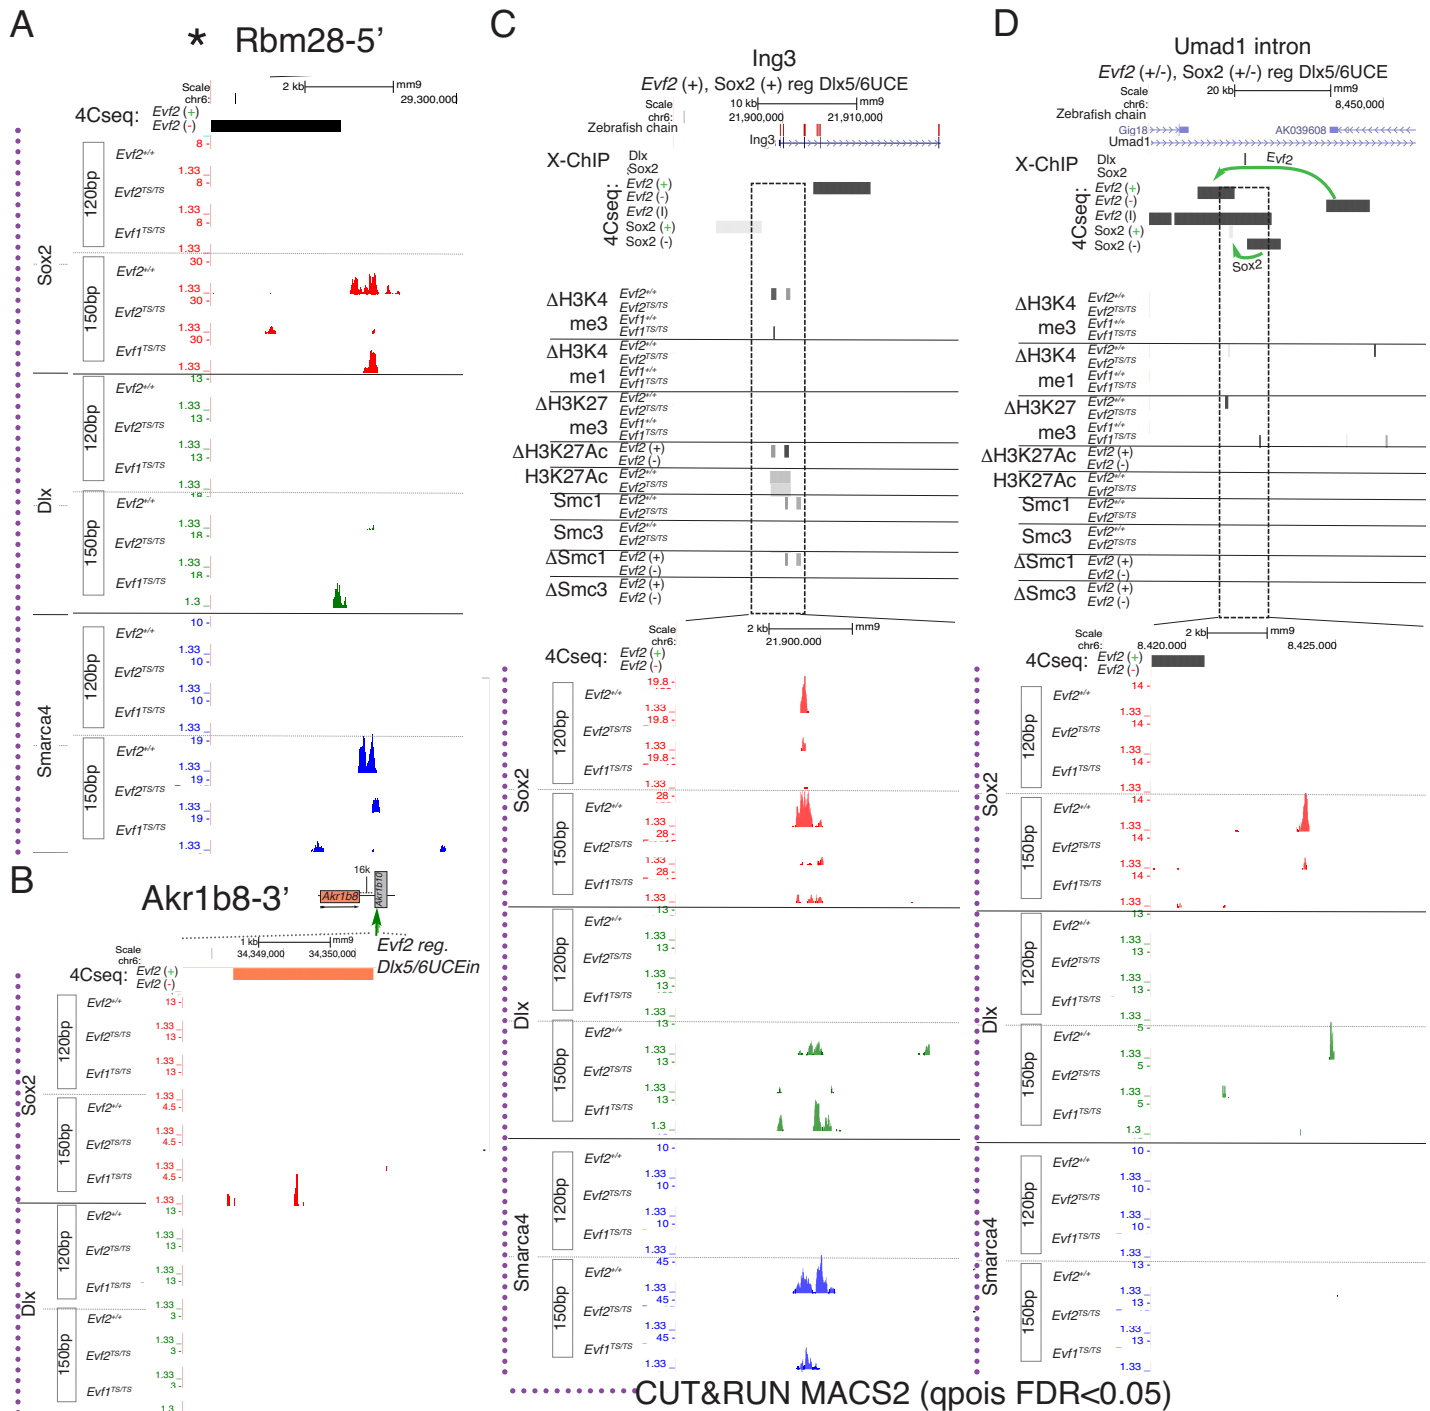

**Figure S3. Relationships between *Evf2*-regulated *Dlx5/6UCEin*, RNP binding, and histone modifications at specific sites on mouse *chr6*.** CUT&RUN 120bp and 150bp profiles of *Evf2*-regulated binding *Evf2* RNPs Sox2, Dlx, Smarca4, histone modifications (H3K27ac/me3, H3K4me3, H3K4me1), and Smc1a and Smc3 at select *Evf2*-regulated *Dlx5/6UCEins* from *Evf2*<sup>+/+</sup>, *Evf2*<sup>TS/TS</sup>, and *Evf1*<sup>TS/TS</sup> E13.5GE. **A.** *Evf2* regulates Sox2 and Smarca4 binding near the *Evf2* negatively regulated *Rbm28-5'-Dlx5/6UCEin*. **B.** *Evf2* regulates Smarca4, but not Sox2 at the *Evf2* positively regulated *Dlx5/6UCEin* located 16kb 3' of *Evf2* repressed target gene *Akrlb8*. **C-D.** ChIPseq profiles of histone modifications (native chromatin:H3K27me3, H3K4me3, H3K4me1 cross linked: H3K27ac), Smc1a/Smc3 (crosslinked chromatin), Sox2, Dlx, Smarca4 (CUT&RUN) overlapping with *Evf2* regulated *Dlx5/6UCEins* generated from 4Cseq analysis. ChIPseq MACS2 peak (FDR<0.05), n=2-4/genotype, histone modification ChIPseq and Smc1/3 ChIPseq, and 4Cseq FourCseq intersection with DEseq data was based on previously reported in Cajigas et al. 2018.

Development • Supplementary information

Fig\_S4

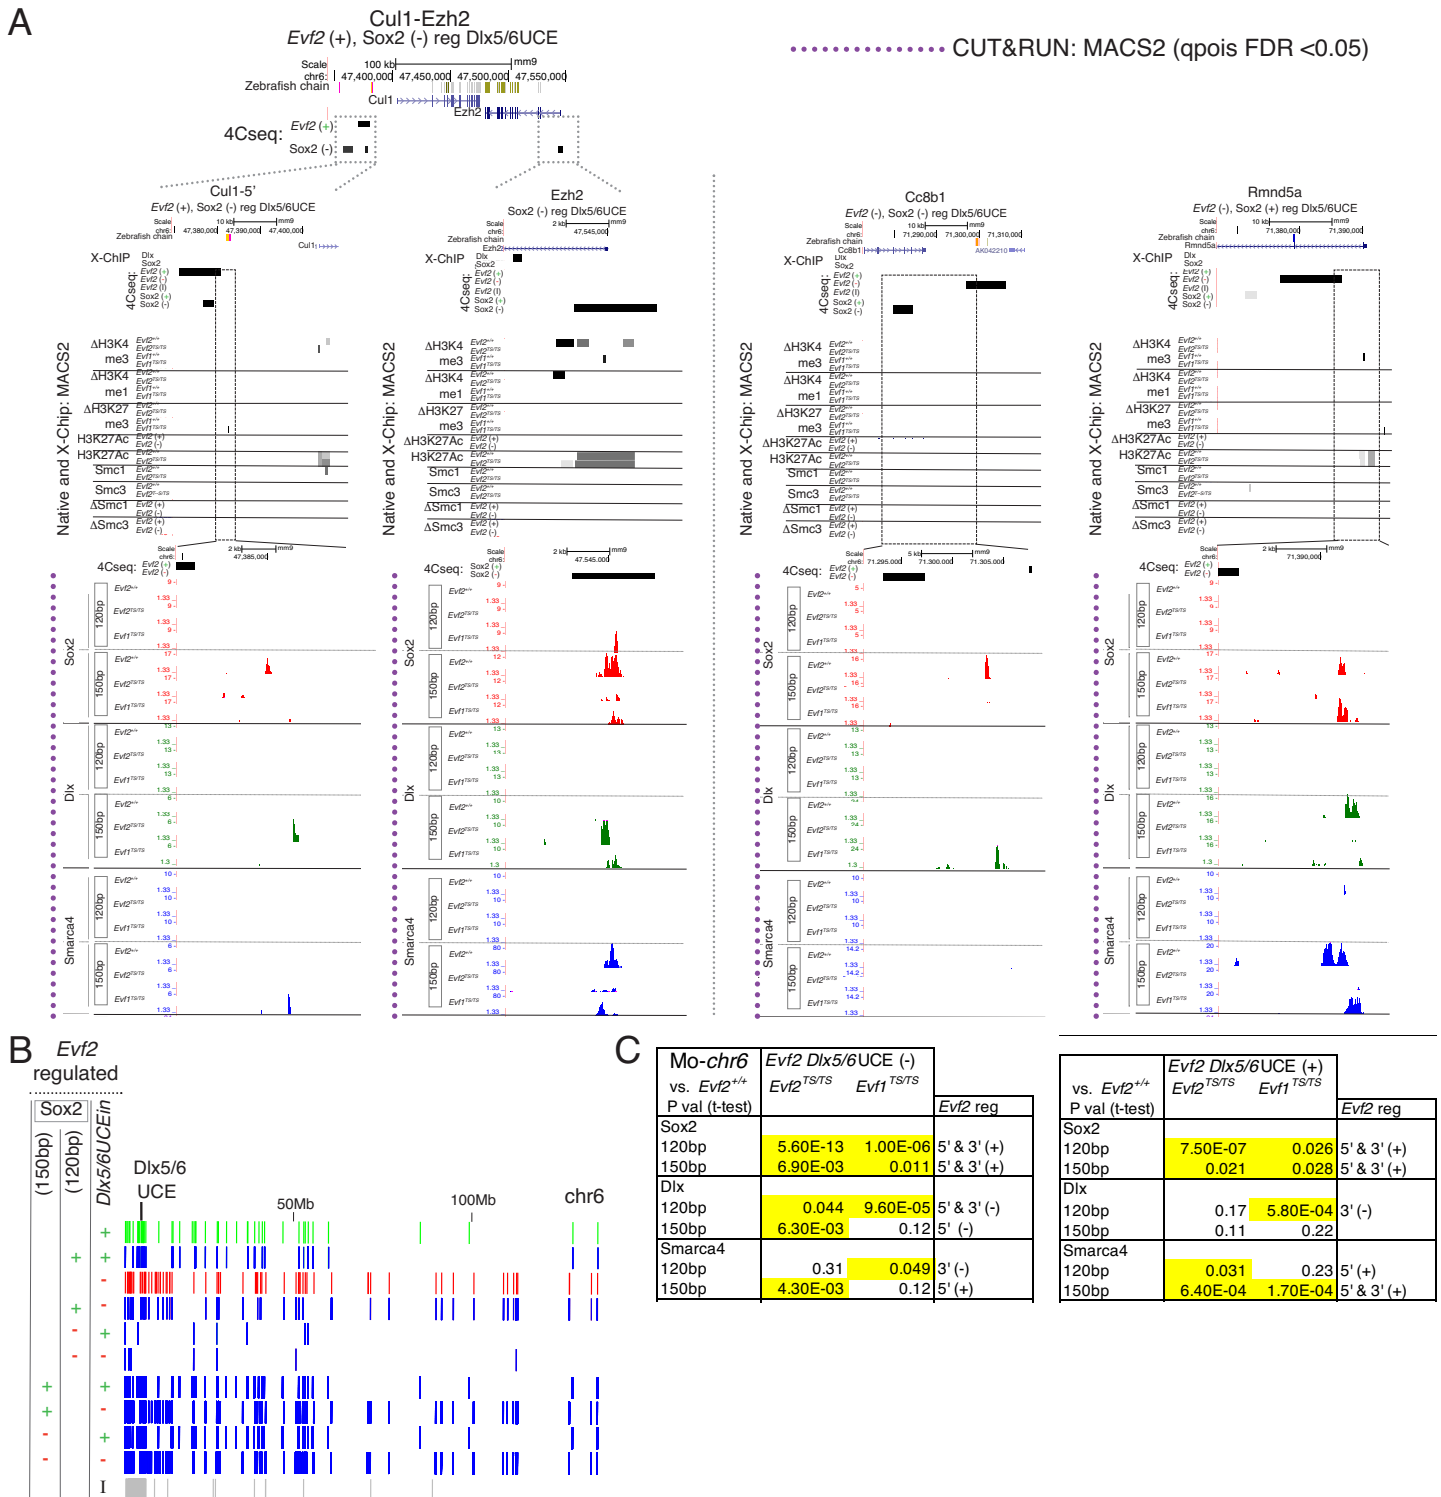

**Figure S4. *Evf2*-regulated *Dlx5/6UCEin*, RNP binding, and histone modifications on mouse *chr6*.** CUT & RUN profiles of *Evf2*-regulated *Evf2* RNPs Sox2, Dlx, Smarca4, histone modifications (H3K27ac/me3, H3K4me3, H3K4me1) and *Evf2*-regulated *Dlx5/6UCEins* from *Evf2*<sup>+/+</sup>, *Evf2*<sup>TS/TS</sup>, and *Evf1*<sup>TS/TS</sup> E13.5GE. **A.** Relationships between ChIPseq profiles of histone modifications (crosslinked and native chromatin), Smc1a/Smc3 (crosslinked chromatin), and Sox2, Dlx, Smarca4 (CUT&RUN, native chromatin) overlapping with *Evf2* regulated *Dlx5/6UCEins* generated from 4Cseq analysis. **B.** *Evf2* regulated Sox2 binding sites overlapping with *Evf2* positively regulated (+) and negatively regulated (-) and independent *Dlx5/6UCEins* across *chr6*. **C.** Statistically significant differences (yellow highlights) in RNP binding (CUT&RUN ChIPseq) at *Evf2* positively and negatively regulated *Dlx5/6UCEins* (4Cseq) from *Evf2*<sup>+/+</sup>, *Evf2*<sup>TS/TS</sup>, and *Evf1*<sup>TS/TS</sup> E13.5GE.

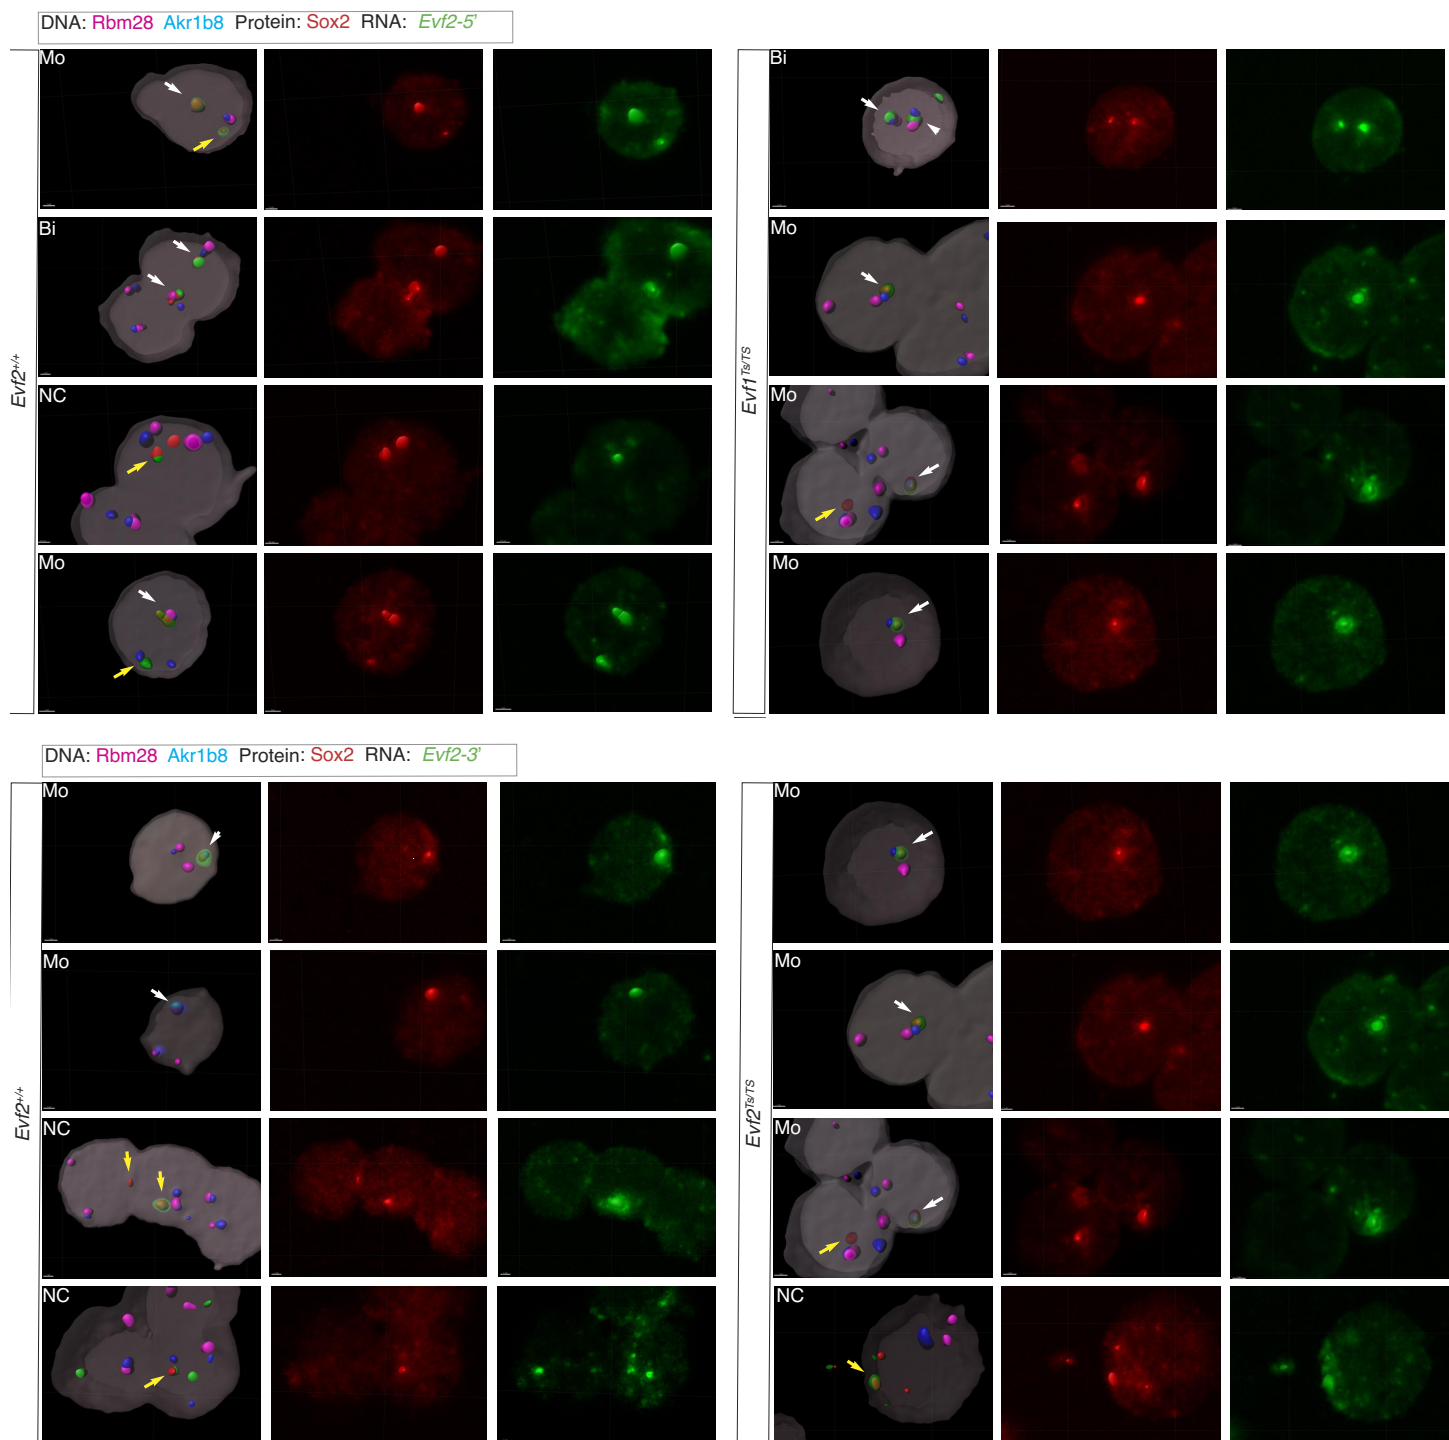

**Figure S5. Additional examples of Evf2 RNA cloud and Sox2 protein pool association with repressed target genes Akrlb8 and Rbm28 in Evf2 mutants.** Imaris 3D reconstructions based on confocal analysis in *Evf2*<sup>+/+</sup>, *Evf2*<sup>TS/TS</sup>, *Evf1*<sup>TS/TS</sup> E13.5 GE nuclei: FISH (fluorescent in situ hybridization of DNA probes) **Rbm28** DNA (pink), **Akrlb8** DNA (blue), **Evf2-5' RNA** (green), **Evf2-3' RNA** (green) and detection of Sox2 protein using anti-Sox2 antibody: **Sox2 protein pools** (red). Mo indicates monoallelic, Bi indicates biallelic, white arrows indicate colocalization of RNA or protein with a DNA target, yellow arrows indicate RNA or protein not colocalized (NC) with a DNA target.

## Fig\_S6

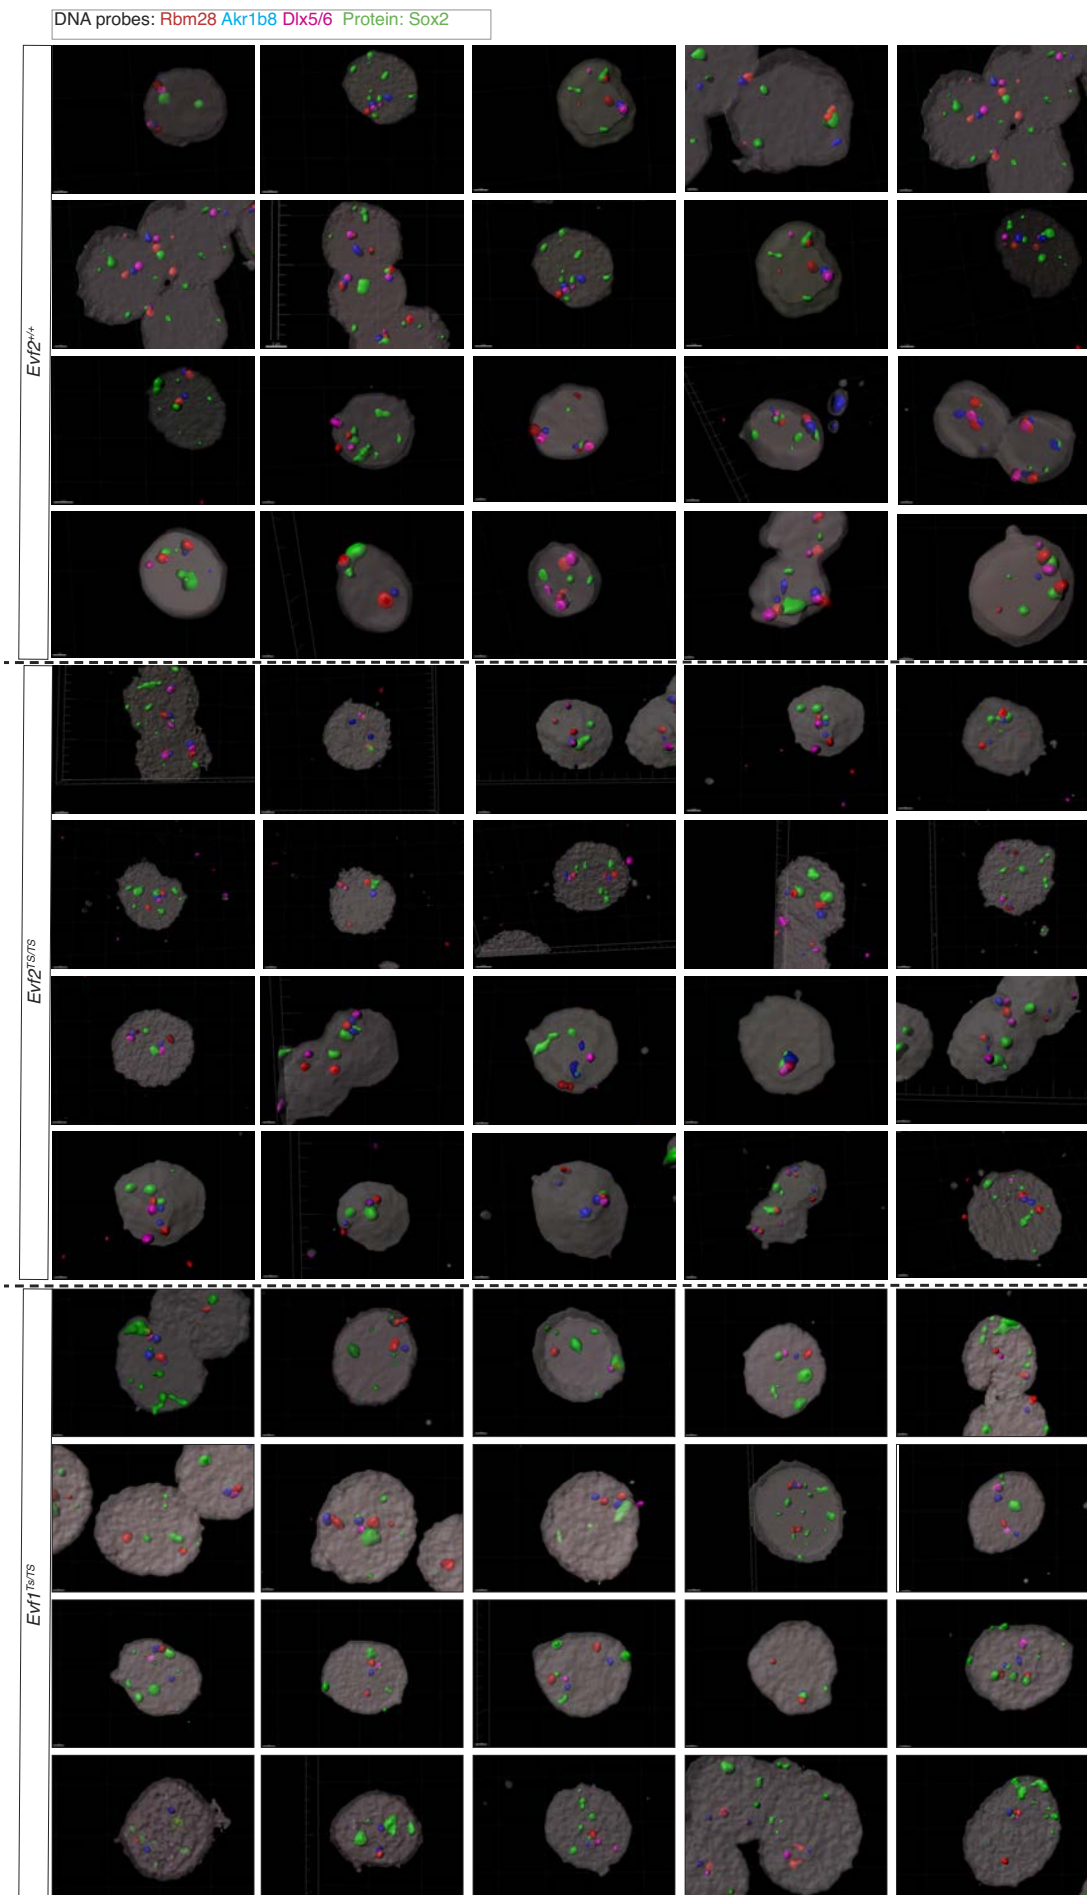

**Figure S6.** Additional examples of Sox2 protein pools associated with repressed gene targets Rbm28 and Akrlb8 and Dlx5/6 in *Evf2* mutants. Imaris 3D reconstructions based on Z-stacks from confocal analysis in *Evf2<sup>+/+</sup>*, *Evf2<sup>TS/TS</sup>*, *Evf1<sup>TS/TS</sup>* E13.5 GE nuclei: FISH (fluorescent in situ hybridization of DNA probes) Rbm28 DNA (red), Akrlb8 DNA (blue), Dlx5/6 DNA (pink), and detection of Sox2 protein using anti-Sox2 antibody: Sox2 protein pools (green).
